# Supplementary material for: Liprin-α proteins are master regulators of human presynapse assembly
Source: PubMed Central journal article supplement (PMC11001580; doi:10.1038/s41593-024-01592-9), 2024-03-12
Supplement: 41593_2024_1592_MOESM1_ESM.pdf [file 41593_2024_1592_MOESM1_ESM.pdf]

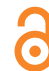

---

# Liprin- $\alpha$ proteins are master regulators of human presynapse assembly

---

In the format provided by the authors and unedited

---

**Supplementary Table 1 – Summary of statistical results**

| FIGURE / PANEL              | SAMPLE SIZE                                                                                                                                                                                                                                                                                                                                                                                                                                                                                                                                                                             | STATISTICS                                                                                                        | RESULTS                                                                                                                                                                                                                                                                                                                                                                                                                                                                                                                                                                                                                                                                                                                                                                                |
|-----------------------------|-----------------------------------------------------------------------------------------------------------------------------------------------------------------------------------------------------------------------------------------------------------------------------------------------------------------------------------------------------------------------------------------------------------------------------------------------------------------------------------------------------------------------------------------------------------------------------------------|-------------------------------------------------------------------------------------------------------------------|----------------------------------------------------------------------------------------------------------------------------------------------------------------------------------------------------------------------------------------------------------------------------------------------------------------------------------------------------------------------------------------------------------------------------------------------------------------------------------------------------------------------------------------------------------------------------------------------------------------------------------------------------------------------------------------------------------------------------------------------------------------------------------------|
| Figure 1d<br>MAP2           | Ctrl <sub>1</sub> 84 fields/3 batches<br>Ctrl <sub>2</sub> 94 fields/3 batches<br>qKO <sub>1</sub> 94 fields/3 batches<br>qKO <sub>2</sub> 80 fields/3 batches                                                                                                                                                                                                                                                                                                                                                                                                                          | Unpaired two-tailed Student's t-tests                                                                             | Ctrl <sub>1</sub> vs. qKO <sub>1</sub> p<0.0001<br>Ctrl <sub>2</sub> vs. qKO <sub>2</sub> p<0.0001                                                                                                                                                                                                                                                                                                                                                                                                                                                                                                                                                                                                                                                                                     |
| Figure 1e<br>Tuj1           | Ctrl <sub>1</sub> 27 fields/3 batches<br>Ctrl <sub>2</sub> 17 fields/3 batches<br>qKO <sub>1</sub> 20 fields/3 batches<br>qKO <sub>2</sub> 21 fields/3 batches                                                                                                                                                                                                                                                                                                                                                                                                                          | Unpaired two-tailed Student's t-tests                                                                             | Ctrl <sub>1</sub> vs. qKO <sub>1</sub> p= 0.2247, ns<br>Ctrl <sub>2</sub> vs. qKO <sub>2</sub> p= 0.6406, ns                                                                                                                                                                                                                                                                                                                                                                                                                                                                                                                                                                                                                                                                           |
| Figure 1f<br>Protein levels | Ctrl <sub>1</sub> 3-7 batches<br>qKO <sub>1</sub> 3-4 batches<br>Ctrl <sub>2</sub> 3-7 batches<br>qKO <sub>2</sub> 3-4 batches                                                                                                                                                                                                                                                                                                                                                                                                                                                          | Two-way ANOVA with Holm-Šidák test for multiple comparisons, comparing Ctrl <sub>1+2</sub> vs. qKO <sub>1+2</sub> | PTPRS: n=3+3 vs 3+3. adj. p = 0.9875<br>pan Nrnx: n=4+4 vs. 4+4. adj. p = 0.9001<br>CASK: n=5+3 vs. 5+3. adj. p = 0.8399<br>Nlgn1: n=5+3 vs. 5+3. adj. p = 0.9001<br>Homer: n=6+3 vs. 6+3. adj. p = 0.3618<br>PSD95: n=3+3 vs 3+3. adj. p = >0.9999<br>ERC 1/2: n=3+3 vs 3+3. adj. p = 0.934<br>RIM1: n=3+3 vs 3+3. adj. p = >0.9999<br>RIMBP2: n=4+4 vs. 4+4. adj. p = 0.1334<br>Munc13-1: n=5+5 vs. 5+5. adj. p = >0.9999<br>Mint1: n=6+3 vs. 6+3. adj. p = 0.4069<br>Veli 1: n=5+3 vs. 5+3. adj. p = 0.7908<br>Veli 2/3: n=5+3 vs. 5+3. adj. p = 0.9001<br>Synapsin2: n=7+4 vs. 7+4. adj. p = 0.3845<br>Syntaxin: n=4+3 vs. 4+3. adj. p = 0.8798<br>SNAP25: n=3+3 vs 3+3. adj. p = 0.967<br>Synaptotagmin1: n=6+3 vs. 6+3. adj. p = 0.0444<br>Rab3a: n=4+4 vs. 4+4. adj. p = 0.0179 |
| Figure 1h                   | Ctrl <sub>1</sub> 24 fields/2 batches<br>Ctrl <sub>2</sub> 22 fields/2 batches<br>qKO <sub>1</sub> 30 fields/2 batches<br>qKO <sub>2</sub> 28 fields/2 batches                                                                                                                                                                                                                                                                                                                                                                                                                          | Two-tailed Mann-Whitney test                                                                                      | Ctrl <sub>1</sub> vs. qKO <sub>1</sub> p < 0.0001<br>Ctrl <sub>2</sub> vs. qKO <sub>2</sub> p < 0.0001                                                                                                                                                                                                                                                                                                                                                                                                                                                                                                                                                                                                                                                                                 |
| Figure 1i                   | qKO <sub>1</sub> 58 cells/4 batches<br>qKO <sub>1</sub> +L1 61 cells/4 batches<br>qKO <sub>1</sub> +L2 66 cells/4 batches<br>qKO <sub>1</sub> +L3 64 cells/4 batches<br>qKO <sub>1</sub> +L4 32 cells/2 batches                                                                                                                                                                                                                                                                                                                                                                         | Kruskal-Wallis test followed by Dunn's multiple comparisons test                                                  | qKO <sub>1</sub> vs. qKO <sub>1</sub> + L1, p < 0.001<br>qKO <sub>1</sub> vs. qKO <sub>1</sub> + L2, p < 0.001<br>qKO <sub>1</sub> vs. qKO <sub>1</sub> + L3, p < 0.001<br>qKO <sub>1</sub> vs. qKO <sub>1</sub> + L4, p < 0.001                                                                                                                                                                                                                                                                                                                                                                                                                                                                                                                                                       |
| Figure 1j                   | SV2:<br>Ctrl <sub>1</sub> 28 fields/3 batches<br>qKO <sub>1</sub> 29 fields/3 batches<br><br>Synaptophysin-1:<br>Ctrl <sub>1</sub> 54 fields/2 batch<br>qKO <sub>1</sub> 31 fields/2 batch<br><br>Piccolo:<br>Ctrl <sub>1</sub> 67 fields/2 batches<br>qKO <sub>1</sub> 54 fields/2 batches<br><br>RIM1:<br>Ctrl <sub>1</sub> 30 fields/2 batches<br>qKO <sub>1</sub> 24 fields/2 batches<br><br>RBP2:<br>Ctrl <sub>1</sub> 32 fields/2 batches<br>qKO <sub>1</sub> 20 fields/2 batches<br><br>CaV2.1:<br>Ctrl <sub>1</sub> 31 fields/2 batches<br>qKO <sub>1</sub> 26 fields/2 batches | Two-tailed Mann-Whitney tests                                                                                     | SV2 puncta:<br>qKO <sub>1</sub> vs. Ctrl <sub>1</sub> , p < 0.0001<br><br>Synaptophysin-1 puncta:<br>qKO <sub>1</sub> vs. Ctrl <sub>1</sub> , p < 0.0001<br><br>Piccolo puncta:<br>qKO <sub>1</sub> vs. Ctrl <sub>1</sub> , p < 0.0001<br><br>RIM1 puncta:<br>qKO <sub>1</sub> vs. Ctrl <sub>1</sub> , p < 0.0001<br><br>RBP2 puncta:<br>qKO <sub>1</sub> vs. Ctrl <sub>1</sub> , p < 0.0001<br><br>CaV2.1 puncta:<br>qKO <sub>1</sub> vs. Ctrl <sub>1</sub> , p = 0.0001                                                                                                                                                                                                                                                                                                              |
| Figure 2b                   | Ctrl <sub>1</sub> 38 boutons (11 grids / 2 batches)<br>qKO <sub>1</sub> 49 boutons (11 grids / 2 batches)<br>qKO <sub>1</sub> +L3 37 boutons (11 grids /1 batch)                                                                                                                                                                                                                                                                                                                                                                                                                        | Kruskal-Wallis test followed by Dunn's multiple comparisons test                                                  | Vesicles per bouton:<br>qKO <sub>1</sub> vs. Ctrl <sub>1</sub> adj. p < 0.0001<br>qKO <sub>1</sub> vs. qKO <sub>1</sub> +L3 adj. p = 0.0012                                                                                                                                                                                                                                                                                                                                                                                                                                                                                                                                                                                                                                            |
| Figure 2c                   | Total number of vesicles analyzed:<br>Ctrl <sub>1</sub> 3020 vesicles / 50 active zones<br>qKO <sub>1</sub> 602 vesicles / 50 active zones<br>qKO <sub>1</sub> +L 1338 vesicles / 41 active zones                                                                                                                                                                                                                                                                                                                                                                                       | (no statistical comparisons made)                                                                                 |                                                                                                                                                                                                                                                                                                                                                                                                                                                                                                                                                                                                                                                                                                                                                                                        |

|                                  |                                                                                                                                                                                                                                                                     |                                                                                                                                                                                                      |                                                                      |                                                                                                                                                                                    |
|----------------------------------|---------------------------------------------------------------------------------------------------------------------------------------------------------------------------------------------------------------------------------------------------------------------|------------------------------------------------------------------------------------------------------------------------------------------------------------------------------------------------------|----------------------------------------------------------------------|------------------------------------------------------------------------------------------------------------------------------------------------------------------------------------|
| Figure 2f                        | Ctrl1 <sup>Nrxn-HA</sup> +Cre<br>qKO1 <sup>Nrxn-HA</sup> +Cre<br>Ctrl1 <sup>Nrxn-HA</sup> no cre virus<br>qKO1 <sup>Nrxn-HA</sup> no cre virus                                                                                                                      | 10 cover slips / 2 batches<br>9 cover slips / 2 batches<br>4 cover slips / 2 batches<br>2 cover slips / 2 batches                                                                                    | (no statistical comparisons made)                                    |                                                                                                                                                                                    |
| Figure 2h-i                      | PSD length:<br>Ctrl1 <sup>Nrxn-HA</sup> +Cre<br>qKO1 <sup>Nrxn-HA</sup> +Cre<br><br>NRXN puncta size:<br>Ctrl1 <sup>Nrxn-HA</sup> +Cre<br>qKO1 <sup>Nrxn-HA</sup> +Cre<br><br>Nanoclusters per PSD<br>Ctrl1 <sup>Nrxn-HA</sup> +Cre<br>qKO1 <sup>Nrxn-HA</sup> +Cre | 32 boutons /1 batch<br>25 boutons/1 batch<br><br>56 PSDs /1 batch<br>41 PSDs /1 batch<br><br>32 boutons /1 batch<br>25 boutons/1 batch                                                               | (no statistical comparisons made)                                    |                                                                                                                                                                                    |
| Figure 3b<br>mEPSCs              | Ctrl1<br>qKO1<br>Ctrl2<br>qKO2                                                                                                                                                                                                                                      | 49 cells/3 batches<br>49 cells/3 batches<br>33 cells/3 batches<br>34 cells/3 batches                                                                                                                 | Two-tailed Mann-Whitney test                                         | Ctrl1 vs. qKO1 p < 0.0001<br>Ctrl2 vs. qKO2 p < 0.0001                                                                                                                             |
| Figure 3d<br>Evoked EPSCs        | Ctrl1<br>qKO1<br>Ctrl1<br>qKO1                                                                                                                                                                                                                                      | 36 cells/2 batches<br>35 cells/2 batches<br>35 cells/2 batches<br>35 cells/2 batches                                                                                                                 | Two-tailed Mann-Whitney test                                         | Ctrl1 vs. qKO1 p < 0.0001<br>Ctrl2 vs. qKO2 p < 0.0001                                                                                                                             |
| Figure 3f<br>mIPSCs              | Ctrl1<br>qKO1<br>Ctrl2<br>qKO2                                                                                                                                                                                                                                      | 41 cells/2 batches<br>41 cells/2 batches<br>59 cells/3 batches<br>61 cells/3 batches                                                                                                                 | Two-tailed Mann-Whitney test                                         | Ctrl1 vs. qKO1 p < 0.0001<br>Ctrl2 vs. qKO2 p < 0.0001                                                                                                                             |
| Figure 3h<br>mEPSC Rescues       | qKO1<br>qKO1+L1<br>qKO1+L2<br>qKO1+L3<br>qKO1+L4                                                                                                                                                                                                                    | 60 cells/3 batches<br>70 cells/5 batches<br>70 cells/5 batches<br>65 cells/5 batches<br>25 cells/2 batches                                                                                           | One-way ANOVA followed by a Bonferroni test for multiple comparisons | qKO1 vs. qKO1 + L1 p < 0.0001<br>qKO1 vs. qKO1 + L2 p < 0.0001<br>qKO1 vs. qKO1 + L3 p < 0.0001<br>qKO1 vs. qKO1 + L4 p < 0.0001                                                   |
| Figure 4a<br>SV2 transport       | Ctrl1<br>qKO1                                                                                                                                                                                                                                                       | 14 fields/2 batches<br>13 fields/2 batches                                                                                                                                                           | Two-tailed Student's t-tests                                         | Velocity:<br>qKO1 vs. Ctrl1, p = 0.54<br>Movement events:<br>qKO1 vs. Ctrl1, p = 0.03                                                                                              |
| Figure 4b<br>ELKS transport      | Ctrl1<br>qKO1                                                                                                                                                                                                                                                       | 10 fields/3 batches<br>12 fields/3 batches                                                                                                                                                           | Two-tailed Student's t-tests                                         | Velocity:<br>qKO1 vs. Ctrl1, p = 0.55<br>Movement events:<br>qKO1 vs. Ctrl1, p = 0.33                                                                                              |
| Figure 4c<br>CASK recruitment    | Ctrl1<br>qKO1                                                                                                                                                                                                                                                       | 158 cells /4 batches<br>119 cells /4 batches                                                                                                                                                         | Two-tailed Mann-Whitney test                                         | Ctrl1 vs. qKO1 p < 0.0001                                                                                                                                                          |
| Figure 4d<br>ELKS recruitment    | Ctrl1<br>qKO1                                                                                                                                                                                                                                                       | 126 cells/3 batches<br>94 cells/3 batches                                                                                                                                                            | Two-tailed Mann-Whitney test                                         | Ctrl1 vs. qKO1 p < 0.0001                                                                                                                                                          |
| Figure 4e<br>RIM recruitment     | Ctrl1<br>qKO1                                                                                                                                                                                                                                                       | 123 cells/3 batches<br>96 cells/3 batches                                                                                                                                                            | Two-tailed Mann-Whitney test                                         | Ctrl1 vs. qKO1 p < 0.0001                                                                                                                                                          |
| Figure 4f<br>Piccolo recruitment | Ctrl1<br>qKO1                                                                                                                                                                                                                                                       | 143 cells/3 batches<br>79 cells/3 batches                                                                                                                                                            | Two-tailed Mann-Whitney test                                         | Ctrl1 vs. qKO1 p < 0.0001                                                                                                                                                          |
| Figure 4g<br>CaV2.1 recruitment  | Ctrl1<br>qKO1                                                                                                                                                                                                                                                       | 98 cells/3 batches<br>86 cells/3 batches                                                                                                                                                             | Two-tailed Mann-Whitney test                                         | Ctrl1 vs. qKO1 p < 0.0001                                                                                                                                                          |
| Figure 5b<br>Recruitment ASF     | qKO1+L3<br>qKO1+L3ΔACC<br>qKO1+L3ΔRIMBD<br>qKO1+L3ΔELKSBD<br>qKO1+L3ΔSAM<br>qKO1+L3ΔLoop<br>qKO1+L3W921A<br>qKO1+L3W856Q                                                                                                                                            | 75 HEK cells/1 batch<br>52 HEK cells /1 batch<br>127 HEK cells /1 batch<br>97 HEK cells /1 batch<br>50 HEK cells /1 batch<br>67 HEK cells /1 batch<br>64 HEK cells /1 batch<br>71 HEK cells /1 batch | (no statistical comparisons made)                                    |                                                                                                                                                                                    |
| Figure 5c<br>Synapsin Puncta     | qKO1 + L3<br>qKO1 + L3 ΔCC<br>qKO1 + L3 ΔRIMBD<br>qKO1 + L3 ΔELKSBD<br>qKO1 + L3 ΔSAM<br>qKO1 + L3 ΔLoop<br>qKO1 + L3 W971A ΔCASK<br>qKO1 + L3 W856Q                                                                                                                | 35 cells/2 batches<br>22 cells/2 batches<br>25 cells/2 batches<br>29 cells/2 batches<br>24 cells/2 batches<br>26 cells/2 batches<br>26 cells/2 batches<br>30 cells/2 batches                         | Kruskal-Wallis test followed by Dunn's multiple comparisons test     | L3 ΔCC vs. L3 ΔRIM-BD, p < 0.0001<br>L3 ΔCC vs. L3 ΔELKS-BD, p=0.1064<br><br>L3 ΔSAM vs. L3 ΔLoop, p= 0.0011<br>L3 ΔSAM vs. L3 W921A, p= 0.0189<br>L3 ΔSAM vs. L3 W856Q, p= 0.3314 |
| Figure 5d<br>mEPSC               | qKO1 + L3<br>qKO1 + L3 ΔCC<br>qKO1 + L3 ΔRIMBD                                                                                                                                                                                                                      | 66 cells/3 batches<br>59 cells/3 batches<br>67 cells/3 batches                                                                                                                                       | Kruskal-Wallis test followed by Dunn's                               | L3 ΔCC vs. L3 ΔRIM-BD, p < 0.0001<br>L3 ΔCC vs. L3 ΔELKS-BD, p=0.1375                                                                                                              |

|                                                |                                                                                                                                                                                                                                                                                    |                                                                                                                                                                                                   |                                                                  |                                                                                                                                                                                                                                                                                                                                                                                                                                             |
|------------------------------------------------|------------------------------------------------------------------------------------------------------------------------------------------------------------------------------------------------------------------------------------------------------------------------------------|---------------------------------------------------------------------------------------------------------------------------------------------------------------------------------------------------|------------------------------------------------------------------|---------------------------------------------------------------------------------------------------------------------------------------------------------------------------------------------------------------------------------------------------------------------------------------------------------------------------------------------------------------------------------------------------------------------------------------------|
|                                                | qKO <sub>1</sub> + L3 ΔELKSBD<br>qKO <sub>1</sub> + L3 ΔSAM<br>qKO <sub>1</sub> + L3 ΔLoop<br>qKO <sub>1</sub> + L3 W931A ΔCASK<br>qKO <sub>1</sub> + L3 W856Q                                                                                                                     | 71 cells/3 batches<br>70 cells/3 batches<br>68 cells/3 batches<br>71 cells/3 batches<br>68 cells/3 batches                                                                                        | multiple comparisons test                                        | L3 ΔSAM vs. L3 ΔLoop, p < 0.0001<br>L3 ΔSAM vs. L3 W921A, p < 0.0001<br>L3 ΔSAM vs. L3 W856Q, p < 0.0001                                                                                                                                                                                                                                                                                                                                    |
| Figure 5e<br>Sucrose                           | qKO <sub>1</sub> + L3<br>qKO <sub>1</sub> + L3 ΔCC<br>qKO <sub>1</sub> + L3 ΔRIMBD<br>qKO <sub>1</sub> + L3 ΔELKSBD<br>qKO <sub>1</sub> + L3 ΔSAM123<br>qKO <sub>1</sub> + L3 ΔLoop<br>qKO <sub>1</sub> + L3 W971A ΔCASK<br>qKO <sub>1</sub> + L3 W856Q                            | 33 cells/3 batches<br>27 cells/3 batches<br>33 cells/3 batches<br>48 cells/3 batches<br>30 cells/3 batches<br>32 cells/3 batches<br>32 cells/3 batches<br>41 cells/3 batches                      | Kruskal-Wallis test followed by Dunn's multiple comparisons test | L3 ΔCC vs. L3 ΔRIM-BD, p < 0.0001<br>L3 ΔCC vs. L3 ΔELKS-BD, p=0.3405<br><br>L3 ΔSAM vs. L3 ΔLoop, p < 0.0001<br>L3 ΔSAM vs. L3 W921A, p < 0.0001<br>L3 ΔSAM vs. L3 W856Q, p=0.0103                                                                                                                                                                                                                                                         |
| Figure 6b<br>QA recruitment                    | Ctrl <sub>1</sub> + L3<br>Ctrl <sub>1</sub> + QA<br>qKO <sub>1</sub> + L3<br>qKO <sub>1</sub> + QA                                                                                                                                                                                 | 73 HEK cells/2 batches<br>188 HEK cells/3 batches<br>78 HEK cells/3 batches<br>156 HEK cells/3 batches                                                                                            | Two-tailed Mann-Whitney test                                     | qKO <sub>1</sub> + L3 vs. qKO <sub>1</sub> + QA p < 0.0001                                                                                                                                                                                                                                                                                                                                                                                  |
| Figure 6c<br>Synapsin puncta QA rescue         | qKO <sub>1</sub><br>qKO <sub>1</sub> + L3<br>qKO <sub>1</sub> + L3W921A; W856Q                                                                                                                                                                                                     | 26 cells/2 batches<br>32 cells/2 batches<br>34 cells/2 batches                                                                                                                                    | Kruskal-Wallis test followed by Dunn's multiple comparisons test | qKO <sub>1</sub> +L3 vs. qKO <sub>1</sub> +L3 QA, p < 0.0001<br>qKO <sub>1</sub> vs. qKO <sub>1</sub> +L3 QA, p = 0.8373                                                                                                                                                                                                                                                                                                                    |
| Figure 6d<br>mEPSCs QA rescue                  | qKO <sub>1</sub><br>qKO <sub>1</sub> + L3<br>qKO <sub>1</sub> + L3 QA                                                                                                                                                                                                              | 67 cells/5 batches<br>49 cells/5 batches<br>83 Cells/5 batches                                                                                                                                    | Kruskal-Wallis test followed by Dunn's multiple comparisons test | qKO <sub>1</sub> +L3 vs. qKO <sub>1</sub> +L3 QA, p < 0.0001<br>qKO <sub>1</sub> vs. qKO <sub>1</sub> +L3 QA, p = 0.107                                                                                                                                                                                                                                                                                                                     |
| Figure 6e<br>Sucrose QA mutant                 | qKO <sub>1</sub><br>qKO <sub>1</sub> + L3<br>qKO <sub>1</sub> + L3 QA                                                                                                                                                                                                              | 35 cells/2 batches<br>40 cells/2 batches<br>33 cells/2 batches                                                                                                                                    | Kruskal-Wallis test followed by Dunn's multiple comparisons test | qKO <sub>1</sub> +L3 vs. qKO <sub>1</sub> +L3 QA, p = 0.0002<br>qKO <sub>1</sub> vs. qKO <sub>1</sub> +L3 QA, p > 0.9999                                                                                                                                                                                                                                                                                                                    |
| Figure 6f<br>Active zone markers               | ELKS signal:<br>qKO <sub>1</sub><br>qKO <sub>1</sub> + L3<br>qKO <sub>1</sub> + L3 QA<br><br>RIM1 signal:<br>qKO <sub>1</sub><br>qKO <sub>1</sub> + L3<br>qKO <sub>1</sub> + L3 QA<br><br>Piccolo signal:<br>qKO <sub>1</sub><br>qKO <sub>1</sub> + L3<br>qKO <sub>1</sub> + L3 QA | 26 ROIs/2 batches<br>33 ROIs/2 batches<br>16 ROIs/2 batches<br><br>26 ROIs/2 batches<br>40 ROIs/2 batches<br>34 ROIs/2 batches<br><br>22 ROIs/2 batches<br>29 ROIs/2 batches<br>22 ROIs/2 batches | Kruskal-Wallis test followed by Dunn's multiple comparisons test | ELKS signal:<br>qKO <sub>1</sub> vs. qKO <sub>1</sub> +L3 QA, p = 0.5314<br>qKO <sub>1</sub> +L3 vs. qKO <sub>1</sub> +L3 QA, p < 0.0001<br><br>RIM1 signal:<br>qKO <sub>1</sub> vs. qKO <sub>1</sub> +L3 QA, p = 0.0432<br>qKO <sub>1</sub> +L3 vs. qKO <sub>1</sub> +L3 QA, p < 0.0001<br><br>Piccolo signal:<br>qKO <sub>1</sub> vs. qKO <sub>1</sub> +L3 QA, p = 0.0896<br>qKO <sub>1</sub> +L3 vs. qKO <sub>1</sub> +L3 QA, p < 0.0001 |
| Ext Data Figure 1d<br>Conversion               | Ctrl <sub>1</sub><br>Ctrl <sub>2</sub><br>qKO <sub>1</sub><br>qKO <sub>2</sub>                                                                                                                                                                                                     | 20 batches<br>10 batches<br>20 batches<br>11 batches                                                                                                                                              | Two-tailed Mann-Whitney test                                     | Ctrl <sub>1</sub> vs. qKO <sub>1</sub> p = 0.6157, ns<br>Ctrl <sub>2</sub> vs. qKO <sub>2</sub> p = 0.6047, ns                                                                                                                                                                                                                                                                                                                              |
| Ext Data Figure 1e<br>AP properties            | Ctrl <sub>1</sub><br>qKO <sub>1</sub><br>Ctrl <sub>2</sub><br>qKO <sub>2</sub>                                                                                                                                                                                                     | 24 Cells/2 batches<br>23 Cells/2 batches<br>22 Cells/2 batches<br>23 Cells/2 batches                                                                                                              | Two-tailed Mann-Whitney test                                     | AP amplitude<br>Ctrl <sub>1</sub> vs. qKO <sub>1</sub> p = 0.1835<br>Ctrl <sub>2</sub> vs. qKO <sub>2</sub> p = 0.1507<br>AP half-width<br>Ctrl <sub>1</sub> vs. qKO <sub>1</sub> p = 0.8043<br>Ctrl <sub>2</sub> vs. qKO <sub>2</sub> p = 0.2016<br>AP max speed<br>Ctrl <sub>1</sub> vs. qKO <sub>1</sub> p = 0.1632<br>Ctrl <sub>2</sub> vs. qKO <sub>2</sub> p = 0.7401                                                                 |
| Ext Data Figure 1g<br>Rheobase and Capacitance | Rheobase:<br>Ctrl <sub>1</sub><br>qKO <sub>1</sub><br>Ctrl <sub>2</sub><br>qKO <sub>2</sub><br><br>Capacitance:<br>Ctrl <sub>1</sub><br>qKO <sub>1</sub><br>Ctrl <sub>2</sub><br>qKO <sub>2</sub>                                                                                  | 40 cells/3 batches<br>37 cells/3 batches<br>31 cells/3 batches<br>40 cells/3 batches<br><br>45 cells/3 batches<br>40 cells/3 batches<br>30 cells/3 batches<br>31 cells/3 batches                  | Unpaired two-tailed Student's t-test with Welch's correction     | Rheobase:<br>Ctrl <sub>1</sub> vs. qKO <sub>1</sub> p < 0.0001<br>Ctrl <sub>2</sub> vs. qKO <sub>2</sub> p < 0.0028<br><br>Capacitance:<br>Ctrl <sub>1</sub> vs. qKO <sub>1</sub> p < 0.0001<br>Ctrl <sub>2</sub> vs. qKO <sub>2</sub> p < 0.0001                                                                                                                                                                                           |
| Ext Data Figure 2b                             | Ctrl,<br>qKO1<br>qKO,+L3                                                                                                                                                                                                                                                           | 1035 vesicles / 50 active zones<br>202 vesicles / 50 active zones<br>505 vesicles / 43 active zones                                                                                               | (no statistical comparisons made)                                |                                                                                                                                                                                                                                                                                                                                                                                                                                             |

|                                                    |                                                                                                                                                                                                                                                                                                                                                                                                                                                                                                                                                                                                                          |                                                                  |                                                                                                                                                                                                                                                                                                                                                                                                                                                                                  |
|----------------------------------------------------|--------------------------------------------------------------------------------------------------------------------------------------------------------------------------------------------------------------------------------------------------------------------------------------------------------------------------------------------------------------------------------------------------------------------------------------------------------------------------------------------------------------------------------------------------------------------------------------------------------------------------|------------------------------------------------------------------|----------------------------------------------------------------------------------------------------------------------------------------------------------------------------------------------------------------------------------------------------------------------------------------------------------------------------------------------------------------------------------------------------------------------------------------------------------------------------------|
| Ext Data Figure 2c                                 | <p>Vesicle size:</p> <p>Ctrl<sub>1</sub> 3124 vesicles<br/>qKO<sub>1</sub> 732 vesicles<br/>qKO<sub>1</sub>+L3 1460 vesicles</p> <p>PSD length:</p> <p>Ctrl<sub>1</sub> 49 PSDs / 2 batches<br/>qKO<sub>1</sub> 53 PSDs / 2 batches<br/>qKO<sub>1</sub>+L3 41 PSDs / 1 batch</p>                                                                                                                                                                                                                                                                                                                                         | Kruskal-Wallis test followed by Dunn's multiple comparisons test | <p>Vesicle size:</p> <p>qKO<sub>1</sub> vs. Ctrl<sub>1</sub> adj. p = 0.8129, ns<br/>qKO<sub>1</sub> vs. qKO<sub>1</sub>+L3 adj. p &gt; 0.9999, ns</p> <p>PSD length:</p> <p>qKO<sub>1</sub> vs. Ctrl<sub>1</sub> adj. p = 0.7933, ns<br/>qKO<sub>1</sub> vs. qKO<sub>1</sub>+L3 adj. p &gt; 0.9999, ns</p>                                                                                                                                                                      |
| Ext Data Figure 2d<br>Sucrose response             | <p>Ctrl<sub>1</sub> 48 cells/3 batches<br/>qKO<sub>1</sub> 57 cells/3 batches</p>                                                                                                                                                                                                                                                                                                                                                                                                                                                                                                                                        | Two-tailed Mann-Whitney test                                     | qKO <sub>1</sub> vs. Ctrl <sub>1</sub> , p < 0.0001                                                                                                                                                                                                                                                                                                                                                                                                                              |
| Ext Data Figure 3a<br>Artificial synapse formation | <p>GFP:</p> <p>Ctrl<sub>1</sub> 70 HEK cells/1 batch<br/>qKO<sub>1</sub> 59 HEK cells/1 batch</p> <p>NLGN1:</p> <p>Ctrl<sub>1</sub> 76 HEK cells/1 batch<br/>qKO<sub>1</sub> 77 HEK cells/1 batch</p> <p>LRRTM2:</p> <p>Ctrl<sub>1</sub> 86 HEK cells/1 batch<br/>qKO<sub>1</sub> 80 HEK cells/1 batch</p> <p>TrkC:</p> <p>Ctrl<sub>1</sub> 93 HEK cells/1 batch<br/>qKO<sub>1</sub> 69 HEK cells/1 batch</p> <p>ILRAPL1:</p> <p>Ctrl<sub>1</sub> 130 HEK cells/1 batch<br/>qKO<sub>1</sub> 122 HEK cells/1 batch</p> <p>NGL3:</p> <p>Ctrl<sub>1</sub> 84 HEK cells/1 batch<br/>qKO<sub>1</sub> 44 HEK cells/1 batch</p> | Kruskal-Wallis test followed by Dunn's multiple comparisons test | <p>GFP:</p> <p>qKO<sub>1</sub> vs. Ctrl<sub>1</sub> ns, adj. p &gt; 0.999</p> <p>NLGN1:</p> <p>qKO<sub>1</sub> vs. Ctrl<sub>1</sub>, adj. p &lt; 0.0001</p> <p>LRRTM2</p> <p>qKO<sub>1</sub> vs. Ctrl<sub>1</sub>, adj. p &lt; 0.0001</p> <p>TrkC</p> <p>qKO<sub>1</sub> vs. Ctrl<sub>1</sub>, adj. p &lt; 0.0001</p> <p>ILRAPL1</p> <p>qKO<sub>1</sub> vs. Ctrl<sub>1</sub>, adj. p &lt; 0.0001</p> <p>NGL3</p> <p>qKO<sub>1</sub> vs. Ctrl<sub>1</sub>, adj. p &lt; 0.0001</p> |
| Ext Data Figure 3b<br>Nrxn1α-HA overexpressed      | <p>Nrxn-HA Nlgn1:</p> <p>Ctrl<sub>1</sub> 164 HEK cells/4 batches<br/>qKO<sub>1</sub> 45 HEK cells/2 batches</p> <p>Nrxn-HA TrkC:</p> <p>Ctrl<sub>1</sub> 43 HEK cells /2 batches<br/>qKO<sub>1</sub> 23 HEK cells /2 batches</p>                                                                                                                                                                                                                                                                                                                                                                                        | Kruskal-Wallis test followed by Dunn's multiple comparisons test | qKO <sub>1</sub> + Nlgn <sub>1</sub> vs. qKO <sub>1</sub> +TrkC p < 0.0001                                                                                                                                                                                                                                                                                                                                                                                                       |
| Ext Data Figure 3c<br>PTPRα-HA overexpressed       | <p>PTPRS-HA Nlgn1:</p> <p>Ctrl<sub>1</sub> 161 HEK cells /4 batches<br/>qKO<sub>1</sub> 85 HEK cells /4 batches</p> <p>PTPRS-HA TrkC:</p> <p>Ctrl<sub>1</sub> 80 HEK cells /3 batches<br/>qKO<sub>1</sub> 90 HEK cells /3 batches</p>                                                                                                                                                                                                                                                                                                                                                                                    | Kruskal-Wallis test followed by Dunn's multiple comparisons test | qKO <sub>1</sub> +TrkC vs. qKO <sub>1</sub> +Nlgn1 p < 0.0001                                                                                                                                                                                                                                                                                                                                                                                                                    |
| Ext Data Figure 3f                                 | <p>Ctrl<sub>1</sub> Nrxn-HA +Cre 281 dendrites/2 batches<br/>qKO<sub>1</sub> Nrxn-HA +Cre 240 dendrites/2 batches<br/>Ctrl<sub>1</sub> Nrxn-HA -Cre 126 dendrites/2 batches<br/>qKO<sub>1</sub> Nrxn-HA -Cre 86 dendrites/2 batches</p>                                                                                                                                                                                                                                                                                                                                                                                  | (no statistical comparisons made)                                |                                                                                                                                                                                                                                                                                                                                                                                                                                                                                  |
| Ext Data Figure 3g<br>NRXN1-HA endogenous          | <p>Nlgn1:</p> <p>Ctrl<sub>1</sub> 239 HEK cells /3 batches<br/>qKO<sub>1</sub> 233 HEK cells /3 batches</p> <p>TrkC:</p> <p>Ctrl<sub>1</sub> 107 HEK cells /2 batches<br/>qKO<sub>1</sub> 90 HEK cells /2 batches</p>                                                                                                                                                                                                                                                                                                                                                                                                    | Kruskal-Wallis test followed by Dunn's multiple comparisons test | qKO <sub>1</sub> NrxnHA+Nlgn1 vs. qKO <sub>1</sub> NrxnHA+TrkC adj. p < 0.0001                                                                                                                                                                                                                                                                                                                                                                                                   |
| Ext Data Figure 4a<br>mEPSCs (4 mM Ca)             | <p>Ctrl<sub>1</sub> 51 cells/3 batches<br/>qKO<sub>1</sub> 55 cells/3 batches<br/>Ctrl<sub>2</sub> 40 cells/3 batches<br/>qKO<sub>2</sub> 37 cells/3 batches</p>                                                                                                                                                                                                                                                                                                                                                                                                                                                         | Two-tailed Mann-Whitney test                                     | <p>Ctrl<sub>1</sub> vs. qKO<sub>1</sub> p &lt; 0.0001<br/>Ctrl<sub>2</sub> vs. qKO<sub>2</sub> p &lt; 0.0001</p>                                                                                                                                                                                                                                                                                                                                                                 |
| Ext Data Figure 4c<br>iGABA Synapsin puncta        | <p>Ctrl<sub>1</sub> 25 cells/1 batch<br/>qKO<sub>1</sub> 26 cells/1 batch<br/>Ctrl<sub>2</sub> 36 cells/2 batches<br/>qKO<sub>2</sub> 35 cells/2 batches</p>                                                                                                                                                                                                                                                                                                                                                                                                                                                             | Unpaired two-tailed Student's t-tests                            | <p>Ctrl<sub>1</sub> vs. qKO<sub>1</sub> p &lt; 0.0001<br/>Ctrl<sub>2</sub> vs. qKO<sub>2</sub> p &lt; 0.0001</p>                                                                                                                                                                                                                                                                                                                                                                 |
| Ext Data Figure 5a<br>Munc13 recruitment           | <p>Ctrl<sub>1</sub> 101 HEK cells/3 batches<br/>qKO<sub>1</sub> 80 HEK cells/3 batches</p>                                                                                                                                                                                                                                                                                                                                                                                                                                                                                                                               | Two-tailed Mann-Whitney test                                     | Ctrl <sub>1</sub> vs. qKO <sub>1</sub> p < 0.0001                                                                                                                                                                                                                                                                                                                                                                                                                                |
| Ext Data Figure 5b<br>RIMBP recruitment            | <p>Ctrl<sub>1</sub> 78 HEK cells/3 batches<br/>qKO<sub>1</sub> 69 HEK cells/3 batches</p>                                                                                                                                                                                                                                                                                                                                                                                                                                                                                                                                | Two-tailed Mann-Whitney test                                     | Ctrl <sub>1</sub> vs. qKO <sub>1</sub> p < 0.0001                                                                                                                                                                                                                                                                                                                                                                                                                                |
| Ext Data Figure 5c<br>Bassoon recruitment          | <p>Ctrl<sub>1</sub> 108 HEK cells/3 batches<br/>qKO<sub>1</sub> 99 HEK cells/3 batches</p>                                                                                                                                                                                                                                                                                                                                                                                                                                                                                                                               | Two-tailed Mann-Whitney test                                     | Ctrl <sub>1</sub> vs. qKO <sub>1</sub> p < 0.0001                                                                                                                                                                                                                                                                                                                                                                                                                                |

|                                               |                                                                                                                                                                                                                                                                                                                           |                                                                                                                                                                                                   |                                                              |                                                                                                                                                                                                                                                                                                                                                                                                                                                                                                                                       |
|-----------------------------------------------|---------------------------------------------------------------------------------------------------------------------------------------------------------------------------------------------------------------------------------------------------------------------------------------------------------------------------|---------------------------------------------------------------------------------------------------------------------------------------------------------------------------------------------------|--------------------------------------------------------------|---------------------------------------------------------------------------------------------------------------------------------------------------------------------------------------------------------------------------------------------------------------------------------------------------------------------------------------------------------------------------------------------------------------------------------------------------------------------------------------------------------------------------------------|
| Ext Data Figure 6b<br>Pearson co-localization | GFP-Liprin- $\alpha$ 3 + Scarlet-ELKS<br>GFP- $\Delta$ ELKSBD + Scarlet-ELKS                                                                                                                                                                                                                                              | 56 cells/4 batches<br>46 cells/4 batches                                                                                                                                                          | Two-tailed Mann-Whitney test                                 | L3 vs $\Delta$ ELKSBD, $p < 0.001$                                                                                                                                                                                                                                                                                                                                                                                                                                                                                                    |
| Ext Data Figure 6c<br>Active zone markers     | ELKS signal:<br>qKO <sub>1</sub><br>qKO <sub>1</sub> + L3<br>qKO <sub>1</sub> + L3 $\Delta$ ELKSBD<br><br>RIM1 signal:<br>qKO <sub>1</sub><br>qKO <sub>1</sub> + L3<br>qKO <sub>1</sub> + L3 $\Delta$ ELKSBD<br><br>Piccolo signal:<br>qKO <sub>1</sub><br>qKO <sub>1</sub> + L3<br>qKO <sub>1</sub> + L3 $\Delta$ ELKSBD | 26 ROIs/2 batches<br>33 ROIs/2 batches<br>31 ROIs/2 batches<br><br>26 ROIs/2 batches<br>40 ROIs/2 batches<br>33 ROIs/2 batches<br><br>22 ROIs/2 batches<br>29 ROIs/2 batches<br>26 ROIs/2 batches | One-way ANOVA followed by a Tukey's multiple comparison test | ELKS signal:<br>qKO <sub>1</sub> vs. qKO <sub>1</sub> +L3 $\Delta$ ELKSBD, $p = 0.2357$<br>qKO <sub>1</sub> +L3 vs. qKO <sub>1</sub> +L3 $\Delta$ ELKSBD, $p < 0.0001$<br><br>RIM1 signal:<br>qKO <sub>1</sub> vs. qKO <sub>1</sub> +L3 $\Delta$ ELKSBD, $p = 0.0417$<br>qKO <sub>1</sub> +L3 vs. qKO <sub>1</sub> +L3 $\Delta$ ELKSBD, $p < 0.0001$<br><br>Piccolo signal:<br>qKO <sub>1</sub> vs. qKO <sub>1</sub> +L3 $\Delta$ ELKSBD, $p = 0.3073$<br>qKO <sub>1</sub> +L3 vs. qKO <sub>1</sub> +L3 $\Delta$ ELKSBD, $p < 0.0001$ |
| Ext Data Figure 7a                            | L3 + PTP $\sigma$<br>L3 W856Q + PTP $\sigma$                                                                                                                                                                                                                                                                              | 30 cells/3 batches<br>30 cells/3 batches                                                                                                                                                          | Unpaired two-tailed Student t-test                           | L3 vs. L3 Q856Q $p < 0.0001$                                                                                                                                                                                                                                                                                                                                                                                                                                                                                                          |
| Ext Data Figure 7b                            | L3 + Nrnx1 $\alpha$<br>L3 + CASK + Nrnx1 $\alpha$<br>L3 W921A + CASK + Nrnx1 $\alpha$                                                                                                                                                                                                                                     | 30 cells/3 batches<br>30 cells/3 batches<br>30 cells/3 batches                                                                                                                                    | One-way ANOVA with Holm-Šidák test for multiple comparisons  | L3 + Nrnx1 $\alpha$ vs.<br>L3 + CASK + Nrnx1 $\alpha$ $p = 0.0014$<br><br>L3 + CASK + Nrnx1 $\alpha$ vs.<br>L3 W921A + CASK + Nrnx1 $\alpha$ $p = 0.0040$                                                                                                                                                                                                                                                                                                                                                                             |

## Supplementary Table 2 – Plasmids

| PLASMID                                             | SOURCE                         |
|-----------------------------------------------------|--------------------------------|
| pSpCas9(BB)-2A-GFP (PX458)                          | RRID: Addgene_48138            |
| LentiCRISPR-v2                                      | RRID: Addgene_52961            |
| PX458-sgRNA-PPFIA1_exon17                           | This paper                     |
| PX458-sgRNA-PPFIA2_exon20                           | This paper                     |
| LentiCRISPR-v2-sgRNA-PPFIA3_exon11                  | This paper                     |
| LentiCRISPR-v2-sgRNA-PPFIA4_exon16                  | This paper                     |
| pFU-EGFP-Liprin- $\alpha$ 1                         | This paper                     |
| pFU-EGFP-Liprin- $\alpha$ 2                         | This paper                     |
| pFU-EGFP-Liprin- $\alpha$ 3                         | This paper                     |
| pFU-EGFP-Liprin- $\alpha$ 4                         | This paper                     |
| pFU-EGFP-PPFIA3 (W921A)                             | This paper                     |
| pFU-EGFP-Liprin- $\alpha$ 3 ( $\Delta$ Loop)        | This paper                     |
| pFU-EGFP-Liprin- $\alpha$ 3 ( $\Delta$ SAM123)      | This paper                     |
| pFU-EGFP-Liprin- $\alpha$ 3 (W856Q)                 | This paper                     |
| pFU-EGFP-Liprin- $\alpha$ 3 (W856Q/W921A) 'QA'      | This paper                     |
| pFU-EGFP-Liprin- $\alpha$ 3 ( $\Delta$ RIMBD)       | This paper                     |
| pFU-EGFP-Liprin- $\alpha$ 3 ( $\Delta$ ELKSBD)      | This paper                     |
| pFU-EGFP-Liprin- $\alpha$ 3 ( $\Delta$ Coiled-coil) | This paper                     |
| pFS-Nrx1 $\alpha$ -HA (based on NM_001403321)       | Ref <sup>2</sup>               |
| pCMV-Nrx1 $\alpha$ -HA (based on NM_001403321)      | Ref <sup>2</sup>               |
| pFS-HA-PTPRS (based on NM_130853)                   | This paper                     |
| pCMV-FLAG-PTPRS (based on NM_130853)                | This paper                     |
| pFU-EGFP-SV2                                        | Ref <sup>3</sup>               |
| pFU-Venus-ELKS1                                     | This paper                     |
| pFU-mScarlet-ELKS1                                  | This paper                     |
| pmCherry-N1                                         | Clontech Laboratories # 632523 |
| pCMV-Nlgn1[-A -B]-Cherry                            | This paper                     |
| pCMV-TrkC-Cherry                                    | This paper                     |
| pEGFP-N1                                            | Clontech Laboratories #6085-1  |
| pCMV-Nlgn1[-A -B]-Venus                             | Ref <sup>4</sup>               |
| pCMV-TrkC-YFP                                       | Ref <sup>2</sup>               |
| pCMV-LRRTM2-GFP                                     | This paper                     |
| pCMV-IL1RAPL1-GFP                                   | This paper                     |
| pCMV-NGL3-GFP                                       | This paper                     |
| pFU-NLS-GFP-Cre                                     | This paper                     |

|                        |                      |
|------------------------|----------------------|
| pAAV-NRXN1-cTr         | Ref <sup>5</sup>     |
| pRC-DJ for AAV         | Ref <sup>6</sup>     |
| pHelper for AAV        | Ref <sup>6</sup>     |
| pAAV-MCS               | RRID: Addgene_46954  |
| pMDLg/pRRE             | RRID: Addgene_12251  |
| pRSV-REV               | RRID: Addgene_12253  |
| pVSVG                  | RRID: Addgene_35616  |
| pFU-M2rtTA             | RRID: Addgene_20342  |
| pTet-O-Ngn2-puromycin  | RRID: Addgene_52047  |
| pTet-O-AScl1-puromycin | RRID: Addgene_97329  |
| pTet-O-Dlx2-hygromycin | RRID: Addgene_97330  |
| pTet-O-Sox9-puromycin  | RRID: Addgene_117269 |
| pTet-O-Nfib-hygromycin | RRID: Addgene_117271 |
| pFU-oChIEF-tdTomato    | This paper           |
| pFU-NLS-EGFP           | This paper           |



### Supplementary Table 3 – Antibodies

| ANTIBODY                                                  | SOURCE                           | IDENTIFIER / RRID                         | USE/DILUTION<br>WB, western blot<br>ICC, immunocytochemistry |
|-----------------------------------------------------------|----------------------------------|-------------------------------------------|--------------------------------------------------------------|
| Mouse anti-β-actin                                        | Sigma                            | Cat #: A5441<br>RRID: AB_476744           | WB: 1:1000                                                   |
| Rabbit anti-Bassoon                                       | Sigma                            | Cat #: SAB5200101                         | ICC: 1:200                                                   |
| Mouse anti-CASK                                           | NeuroMab                         | Cat #: 75-000<br>RRID: AB_2068730         | WB: 1:1000<br>ICC: 1:200                                     |
| Rabbit anti-Ca <sup>2+</sup> channel<br>P/Q-type alpha-1A | Synaptic Systems                 | Cat #: 152 203<br>RRID: AB_2619841        | ICC: 1:200                                                   |
| Rabbit anti-ERC1/2                                        | Synaptic Systems                 | Cat #: 143003<br>RRID: AB_887715          | WB: 1:1000<br>ICC: 1:200                                     |
| Mouse anti-GFP                                            | DSHB                             | Cat #: DSHB-GFP-4C9-b<br>RRID: AB_2617422 | ICC: 1:500                                                   |
| Rabbit anti-GFP                                           | Thermo Fisher<br>Scientific      | Cat #: A11122<br>RRID: AB_221569          | WB: 1:1000                                                   |
| Mouse anti-FLAG                                           | Sigma                            | Cat #: F1804<br>RRID: AB_262044           | ICC: 1:200                                                   |
| Mouse anti-HA (HA.11)                                     | BioLegend                        | Cat #: 901513<br>RRID: AB_2565335         | ICC: 1:200                                                   |
| Mouse anti-HA (HA.11)<br>Alexa-488-conjugated             | BioLegend                        | Cat #: 901509<br>RRID: AB_2565072         | ICC: 1:200                                                   |
| Rabbit anti-HA (C29F4)                                    | Cell Signalling                  | Cat #: 3724<br>RRID: AB_1549585           | ICC: 1:200                                                   |
| Rabbit anti-Homer1                                        | Synaptic Systems                 | Cat #: 160003<br>RRID: AB_887730          | WB: 1:1000                                                   |
| Rabbit anti-Liprin-α1                                     | Gift from S. Schoch <sup>1</sup> | A121                                      | WB: 1:200                                                    |
| Rabbit anti-Liprin-α2                                     | Gift from S. Schoch <sup>1</sup> | A13                                       | WB: 1:200                                                    |
| Rabbit anti-Liprin-α3                                     | Gift from S. Schoch <sup>1</sup> | A115                                      | WB: 1:200                                                    |
| Rabbit anti-Liprin-α4                                     | Gift from S. Schoch <sup>1</sup> | A2                                        | WB: 1:200                                                    |
| Chicken anti-MAP2                                         | Encor                            | Cat #: CPCA-MAP2<br>RRID: AB_2138173      | ICC: 1:1000                                                  |
| Rabbit anti-Mint1                                         | Synaptic Systems                 | Cat #: 144103<br>RRID: AB_10635158        | WB: 1:1000<br>ICC: 1:200                                     |
| Rabbit anti-Munc13-1                                      | Synaptic Systems                 | Cat #: 126103<br>RRID: AB_887733          | WB: 1:1000<br>ICC: 1:200                                     |
| Rabbit anti-Neuroigin-1                                   | NeuroMab                         | Cat #: 75-160<br>RRID: AB_2235964         | WB: 1:500                                                    |
| Rabbit anti-panNeurexin-1                                 | Millipore                        | Cat #: ABN161-I<br>RRID: AB_10917110      | WB: 1:1000                                                   |
| Rabbit anti-Piccolo                                       | Synaptic Systems                 | Cat # 142 003<br>RRID: AB_2160182         | ICC: 1:200                                                   |
| Mouse anti-PSD95                                          | Thermo Fisher<br>Scientific      | Cat #: MA1-046<br>RRID: AB_2092361        | WB: 1:500                                                    |

|                                                   |                          |                                           |                           |
|---------------------------------------------------|--------------------------|-------------------------------------------|---------------------------|
| Mouse anti-PSD95                                  | NeuroMab                 | Cat #: 75-028(K28/43)<br>RRID: AB_2877189 | ICC: 1:100                |
| Rabbit anti-PSD95                                 | Addgene                  | Cat #: 196561(K28/43)<br>RRID: AB_2928071 | ICC: 1:100                |
| Mouse anti-PTPRS                                  | MediMabs                 | Cat #: MM-0020<br>RRID: AB_1808357        | WB: 1:1000                |
| Rabbit anti-RIM1                                  | Synaptic Systems         | Cat #: 140003<br>RRID: AB_887774          | WB: 1:1000                |
| Rabbit anti-RIM1/2                                | Synaptic Systems         | Cat #: 140213<br>RRID: AB_2832237         | ICC: 1:200                |
| Rabbit anti-RIM-BP2                               | Synaptic Systems         | Cat #: 316103<br>RRID: AB_2619739         | WB: 1:1000<br>ICC: 1:200  |
| Rabbit anti-Rab3a                                 | Synaptic Systems         | Cat #: 107 111<br>RRID: AB_887770         | WB: 1:1000                |
| Rabbit anti-SNAP25                                | Sigma                    | Cat #: S9684<br>RRID: AB_261576           | WB: 1:2000                |
| Rabbit anti-Synapsin                              | This paper               | nc30-1<br>Custom-made by                  | WB: 1:1000<br>ICC: 1:1000 |
| Rabbit anti-Synapsin                              | Gift from T. Südhof      | E028<br>RRID: AB_2315400                  | ICC: 1:1000               |
| Mouse anti-Synapsin 2                             | Sigma                    | Cat #: MABN1584                           | WB: 1:1000                |
| Mouse anti-Synaptophysin1                         | Synaptic Systems         | Cat #: 101 011<br>RRID: AB_887824         | ICC: 1:200                |
| Chicken anti-Synaptotagmin1                       | Aves Labs                | Cat #: STG<br>RRID: AB_2313562            | WB: 1:1000                |
| Mouse anti-Syntaxin1A                             | Synaptic Systems         | Cat #: 110 111<br>RRID: AB_887848         | WB: 1:1000                |
| Mouse anti-SV2                                    | DSHB                     | Cat #: SV2-c<br>RRID: AB_2315387          | ICC: 1:500                |
| Mouse anti-Tuj1 ( $\alpha$ - $\beta$ III-Tubulin) | BioLegend                | Cat #: 801201<br>RRID: AB_2313773         | WB: 1:5000<br>ICC: 1:1000 |
| Rabbit anti-Veli1/2/3                             | Synaptic Systems         | Cat #: 184002<br>RRID: AB_2281173         | WB: 1:1000                |
| Goat anti-Mouse Alexa Fluor 488                   | Thermo Fisher Scientific | Cat #: A-11001<br>RRID: AB_2534069        | ICC: 1:1000               |
| Goat anti-Mouse Alexa Fluor 568                   | Thermo Fisher Scientific | Cat #: A-11004<br>RRID: AB_2534072        | ICC: 1:1000               |
| Goat anti-Mouse Alexa Fluor 633                   | Thermo Fisher Scientific | Cat #: A-21052<br>RRID: AB_2535719        | ICC: 1:600                |
| Goat anti-Rabbit Alexa Fluor 405                  | Thermo Fisher Scientific | Cat #: A-31556<br>RRID: AB_221605         | ICC: 1:1000               |
| Goat anti-Rabbit Alexa Fluor 488                  | Thermo Fisher Scientific | Cat #: A-32731<br>RRID: AB_2633280        | ICC: 1:1000               |
| Goat anti-Rabbit Alexa Fluor 568                  | Thermo Fisher Scientific | Cat #: A-11011<br>RRID: AB_143157         | ICC: 1:1000               |
| Goat anti-Mouse Alexa Fluor 594                   | Thermo Fisher Scientific | Cat #: A-11032<br>RRID: AB_2534091        | ICC: 1:1000               |
| Goat anti-Rabbit Alexa Fluor 633                  | Thermo Fisher Scientific | Cat #: A-21071<br>RRID: AB_2535732        | ICC: 1:600                |

|                                   |                          |                                       |              |
|-----------------------------------|--------------------------|---------------------------------------|--------------|
| Goat anti-Rabbit Alexa Fluor 647  | Thermo Fisher Scientific | Cat #: A-21245<br>RRID: AB_2535813    | ICC: 1:600   |
| Goat anti-Chicken-CF405M          | Sigma                    | Cat #: SAB4600466                     | ICC: 1:1000  |
| Goat anti-Chicken Alexa Fluor 633 | Thermo Fisher Scientific | Cat #: A-21103<br>RRID: AB_2535756    | ICC: 1:600   |
| Goat anti-Mouse 680RD             | LI-COR                   | Cat #: 925-68070<br>RRID: AB_2651128  | WB: 1:10,000 |
| Goat anti-Mouse 800CW             | LI-COR                   | Cat #: 925-32210<br>RRID: AB_2687825  | WB: 1:10,000 |
| Goat anti-Rabbit 680RD            | LI-COR                   | Cat #: 925-68071<br>RRID: AB_2721181  | WB: 1:10,000 |
| Goat anti-Rabbit 800CW            | LI-COR                   | Cat #: 925-32211<br>RRID: AB_621843   | WB: 1:10,000 |
| Donkey anti-Chicken 680RD         | LI-COR                   | Cat #: 926-68075<br>RRID: AB_10974977 | WB: 1:10,000 |

#### SUPPLEMENTARY INFORMATION REFERENCES

1. Zürner, M., Mittelstaedt, T., tom Dieck, S., Becker, A. & Schoch, S. Analyses of the spatiotemporal expression and subcellular localization of liprin- $\alpha$  proteins. *The Journal of Comparative Neurology* **519**, 3019-3039 (2011).
2. Montoliu-Gaya, L., *et al.* CA10 regulates neurexin heparan sulfate addition via a direct binding in the secretory pathway. *EMBO Rep* **22**, e51349 (2021).
3. Maas, C., *et al.* Formation of Golgi-Derived Active Zone Precursor Vesicles. *Journal of Neuroscience* **32**, 11095-11108 (2012).
4. Gokce, O. & Südhof, T.C. Membrane-tethered monomeric neurexin LNS-domain triggers synapse formation. *The Journal of neuroscience : the official journal of the Society for Neuroscience* **33**, 14617-14628 (2013).
5. Pak, C., *et al.* Human Neuropsychiatric Disease Modeling using Conditional Deletion Reveals Synaptic Transmission Defects Caused by Heterozygous Mutations in NRXN1. *Cell Stem Cell* **17**, 316-328 (2015).
6. Grimm, D., *et al.* In vitro and in vivo gene therapy vector evolution via multispecies interbreeding and retargeting of adeno-associated viruses. *J Virol* **82**, 5887-5911 (2008).
