# Supplementary material for: Liprin-α proteins are master regulators of human presynapse assembly
Source: PubMed Central journal article supplement (PMC11001580; doi:10.1038/s41593-024-01592-9), 2024-03-12

### Ext Data Figure 1C

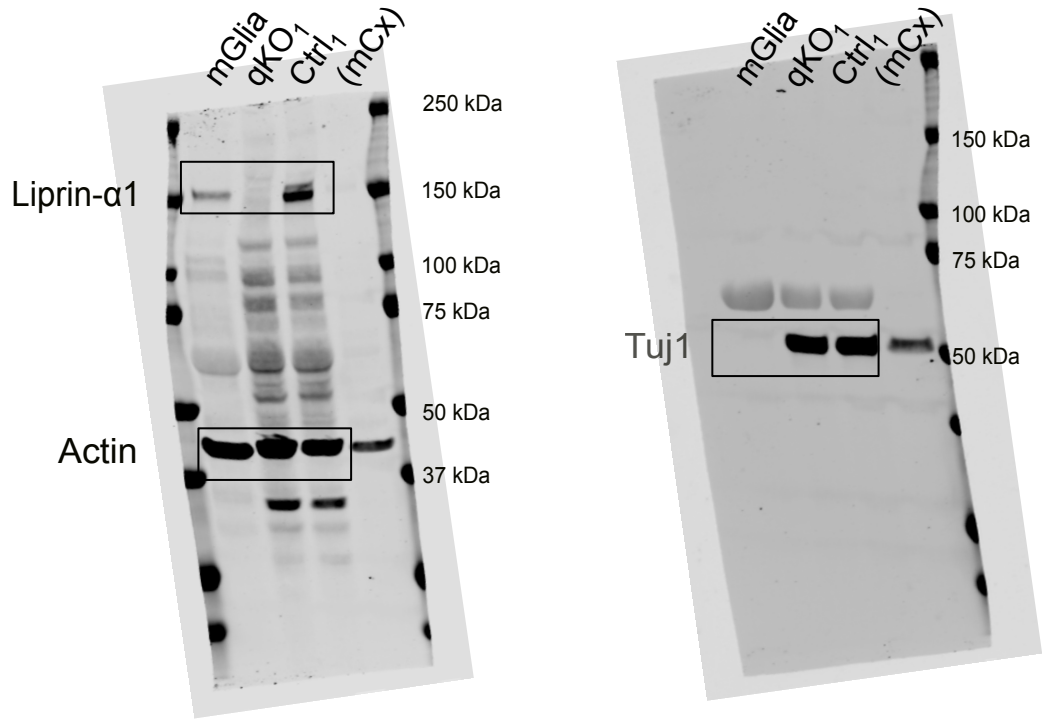

### Ext Data Figure 1H

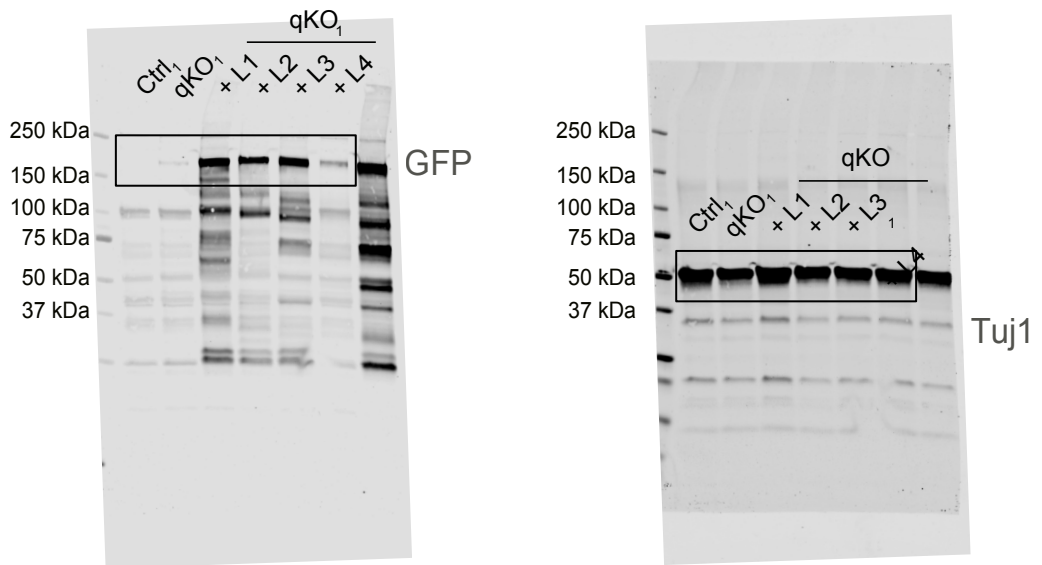

Supplement: 41593_2024_1592_MOESM12_ESM.pdf [file 41593_2024_1592_MOESM12_ESM.pdf]
